# Supplementary material for: Constructing Equity Investment Strategies Using Analyst Reports and Regime Switching Models
Source: Frontiers journal article supplement (doi:10.3389/frai.2022.865950), 2022-05-18
Supplement: Data_Sheet_1.pdf [file Data_Sheet_1.pdf]

# Constructing Equity Investment Strategies using Analyst Reports and Regime Switching Models

Rei Taguchi<sup>1,\*</sup>, Hikaru Watanabe<sup>2</sup>, Hiroki Sakaji<sup>1</sup>, Kiyoshi Izumi<sup>1</sup> and Kenji Hiramatsu<sup>3</sup>

<sup>1</sup>*School of Engineering, The University of Tokyo, Tokyo, Japan*

<sup>2</sup>*Faculty of Engineering, The University of Tokyo, Tokyo, Japan*

<sup>3</sup>*IFIS Japan Limited, Tokyo, Japan*

Correspondence\*:

Rei Taguchi

s5abadiee@g.ecc.u-tokyo.ac.jp

## REFERENCES

- Baum, L. E., Petrie, T., Soules, G., and Weiss, N. (1970). A maximization technique occurring in the statistical analysis of probabilistic functions of markov chains. *The annals of mathematical statistics* 41, 164–171
- Viterbi, A. (1967). Error bounds for convolutional codes and an asymptotically optimum decoding algorithm. *IEEE Transactions on Information Theory* 13, 260–269. doi:10.1109/TIT.1967.1054010

## APPENDIX A ALGORITHM OF BIGRU

Details of the algorithm of BiGRU are given in this appendix. First, we describe the GRU algorithm. If the number of hidden units is  $h$ , the input of the small batch at time  $t$  is  $X_t \in \mathbb{R}^{n \times d}$  (the number of samples is  $n$  and the number of inputs is  $d$ ), and the hidden state at time  $t - 1$  is  $X_{t-1} \in \mathbb{R}^{n \times h}$ . The reset gate vector  $R_t$  at time  $t$  is as follows:

$$R_t = \sigma(X_t W_{xr} + H_{t-1} W_{hr} + b_r) \quad (1)$$

The updated gate vector  $Z_t$  at time  $t$  is

$$Z_t = \sigma(X_t W_{xz} + H_{t-1} W_{hz} + b_z) \quad (2)$$

The activation candidate vector  $\tilde{H}_t$  at time  $t$  is

$$\tilde{H}_t = \tanh(X_t W_{xh} + (R_t \circ H_{t-1}) W_{hh} + b_h) \quad (3)$$

The output vector  $H_t$  at time  $t$  is

$$H_t = (1 - Z_t) \circ H_{t-1} + Z_t \circ \tilde{H}_t \quad (4)$$

$\sigma(\cdot)$  is the sigmoid activation function, expressed as  $\sigma(x) = \frac{1}{1+e^{-x}}$ . Moreover,  $\circ$  denotes the hadamard product. In addition,  $\tanh$  is the hyperbolic tangent function, and expressed as  $\tanh(x) = 1 - \frac{2}{1+e^{-2x}}$ .

Second, we describe the BiGRU algorithm. The state  $H_t$  of the hidden layer at time  $t$  is determined from the input  $X_t$  at time  $t$ , the output  $\vec{H}_t$  of the hidden layer in forward propagation, and the output  $\overleftarrow{H}_t$  of the hidden layer in reverse propagation and can be formulated as follows:

$$\vec{H}_t = GRU(H_t, \vec{H}_{t-1}) \quad (5)$$

$$\overleftarrow{H}_t = GRU(H_t, \overleftarrow{H}_{t-1}) \quad (6)$$

$$H_t = w_t \vec{H}_t + v_t \overleftarrow{H}_t + b_t \quad (7)$$

The  $GRU(\cdot)$  function applies a nonlinear transformation to the input data using GRU.

**Table 1.** Notation of GRU

| Notation |                                                                             |
|----------|-----------------------------------------------------------------------------|
| $W_{xr}$ | weight vector for the input of the reset gate                               |
| $W_{hr}$ | weight vector for the output of the reset gate                              |
| $W_{xz}$ | weight vector for the input of the update gate                              |
| $W_{hz}$ | weight vector for the output of the update gate                             |
| $w_t$    | weight of the hidden layer output $\vec{H}_t$ in forward propagation        |
| $v_t$    | weight of the hidden layer output $\overleftarrow{H}_t$ in back propagation |
| $b_r$    | bias of reset gate                                                          |
| $b_z$    | bias of update gate                                                         |
| $b_t$    | bias of hidden layer at time $t$                                            |

Please see Table 1 for GRU notation.

## APPENDIX B ALGORITHM OF GMM-HMM

Details of the algorithm of GMM-HMM are presented in this appendix. In GMM-HMM, the hidden states are generated according to a Gaussian mixture distribution. In addition, in GMM-HMM, the output probability matrix  $B$  can be approximated as a combination of products of mixture Gaussian distributions.

- Determine the number  $N$  of hidden states.
- In the observation series  $O$ , calculate and record the parameters of the HMM  $\lambda = (A, B, \pi)$  using the BaumWelch algorithm (Baum et al., 1970).
- The probability  $P\{S_t = i\}, i = \{1, \dots, N\}, t = \{0, \dots, T-1\}$  is estimated using the Viterbi algorithm (Viterbi, 1967).

The process of the GMM-HMM algorithm is shown above.

Please see Table 2 for the Notation of GMM-HMM.

**Table 2.** Notation of GMM-HMM

| Notation                      |                                         |
|-------------------------------|-----------------------------------------|
| $T$                           | length of the observation sequence      |
| $N$                           | number of states included in the model  |
| $M$                           | number of observation symbols           |
| $A$                           | transition probability matrix           |
| $B$                           | output probability matrix               |
| $\pi$                         | initial probability distribution vector |
| $O = \{O_0, \dots, O_{T-1}\}$ | observation sequence                    |
| $S = \{S_0, \dots, S_{T-1}\}$ | state sequence                          |
| $V = \{V_0, \dots, V_{M-1}\}$ | set of observable observations          |
| $\lambda = (A, B, \pi)$       | HMM                                     |

## APPENDIX C COMBINATION OF STOCKS USED IN THE INVESTMENT SIMULATION

This table shows the combination of stocks used in the investment simulation in Section 4.4.

**Table 3.** Combination of Stocks used in the Investment Simulation

| Industry Name                       | Constituent Stocks 1                    | Constituent Stocks 2               |
|-------------------------------------|-----------------------------------------|------------------------------------|
| Fisheries, Agriculture and Forestry | Kyokuyo (1301)                          | Hokuto (1379)                      |
| Mining                              | Nittetsu Mining (1515)                  | Sumiseki HD (1514)                 |
| Construction                        | Tokyu Construction (1720)               | UEKI Corporation (1867)            |
| Foodstuffs                          | Morinaga Milk (2264)                    | DyDo Group HD (2590)               |
| Textiles                            | Fujiboh HD (3104)                       | Katakura Industries (3001)         |
| Pulp and Paper                      | Oji HD (3861)                           | Nippon Paper Group (3863)          |
| Chemistry                           | Asahi Kasei (3407)                      | Nissan Chemical (4021)             |
| Pharmaceuticals                     | Kyowa Kirin (4151)                      | Rohto Pharmaceutical (4527)        |
| Oil and Coal Products               | Yushiro Chemical Industry (5013)        | Nippon Coke and Engineering (3315) |
| Rubber Products                     | Bridgestone Corporation (5108)          | Sumitomo Rubber Industries (5110)  |
| Glass, Clay and Stone Products      | Nippon Electric Glass (5214)            | Nittobo (3110)                     |
| Steel                               | Nippon Seisen (5659)                    | Shin Nippon Denko (5563)           |
| Nonferrous Metals                   | Showa Denko HD (5805)                   | Asaka Riken (5724)                 |
| Metal Products                      | Bunka Shutter (5930)                    | LIXIL (5938)                       |
| Machinery                           | Disco (6146)                            | Tsugami (6101)                     |
| Electronic Equipment                | Fuji Electric (6504)                    | Ibiden (4062)                      |
| Transport Equipment                 | Shimano (7309)                          | Japan Engine Corporation (6106)    |
| Precision Equipment                 | Shimadzu (7701)                         | HOYA (7741)                        |
| Other Products                      | Snow Peak (7816)                        | Maeda Kosen (7821)                 |
| Electricity and Gas                 | EREX (9517)                             | Shizuoka Gas (9543)                |
| Land Transportation                 | Hitachi Transport System (9086)         | Senko Group HD (9069)              |
| Marine Transportation               | Nippon Yusen KK (9101)                  | Iino Kaiun Kaisha (9119)           |
| Air Transportation                  | ANA HD (9202)                           | Japan Airlines (9201)              |
| Warehousing and Transportation      | Mitsubishi Logistics Corporation (9301) | MITSUI-SOKO (9302)                 |
| Information and Communication       | GMO Payment Gateway (3769)              | MoneyForward (3994)                |
| Wholesale business                  | Tomen Devices (2737)                    | Matsuda Sangyo (7456)              |
| Retailing                           | ZOZO (3092)                             | Golf Digest Online (3319)          |
| Banking                             | Tohoku Bank (8349)                      | Bank of Kyoto (8369)               |
| Securities and Commodity Futures    | JAFco Group (8595)                      | Monex Group (8698)                 |
| Insurance                           | SOMPO HD (8630)                         | MS&AD Insurance Group HD (8725)    |
| Other Financial Services            | Japan Securities Finance (8511)         | Aiful Corporation (8515)           |
| Real Estates                        | Nomura Real Estate HD (3231)            | Mitsubishi Estate (8802)           |
| Service                             | Japan M&A Center HD (2127)              | Mixi (2121)                        |
